# Supplementary material for: Investigating the impact of a newly developed chemical modification technique on improving the tribological properties of high oleic soybean oil
Source: Royal Society of Chemistry journal article supplement (doi:10.1039/d3se01526b), 2024-01-01
Supplement: d3se01526b1.pdf [file d3se01526b1.pdf]

### Supplementary information

#### Investigating the influence of novel chemical modification process on enhancing the tribological behavior of high oleic soybean oil

Piash Bhowmik<sup>a</sup>, Brajendra K. Sharma<sup>b</sup>, Majher Sarker<sup>b</sup>, Hyunsuk Choi<sup>a</sup>, Clement Tang<sup>a</sup>, Sougata Roy<sup>a</sup>

<sup>a</sup>Department of Mechanical Engineering, University of North Dakota, Grand Forks, ND, USA

<sup>b</sup>Sustainable Biofuels and Coproducts Research, USDA-ARS-NEA-ERRC, Wyndmoor, PA, USA

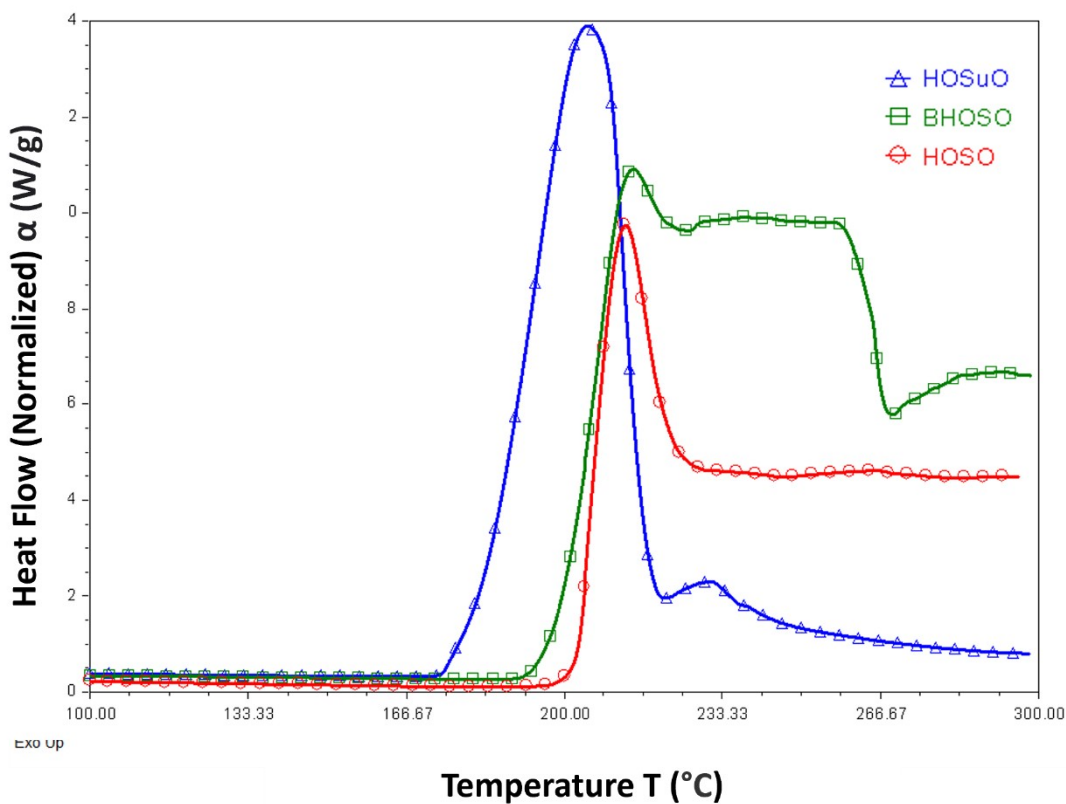

Figure S1. Thermal analyses curves of HOSO, BHOSO, and HOSuO.

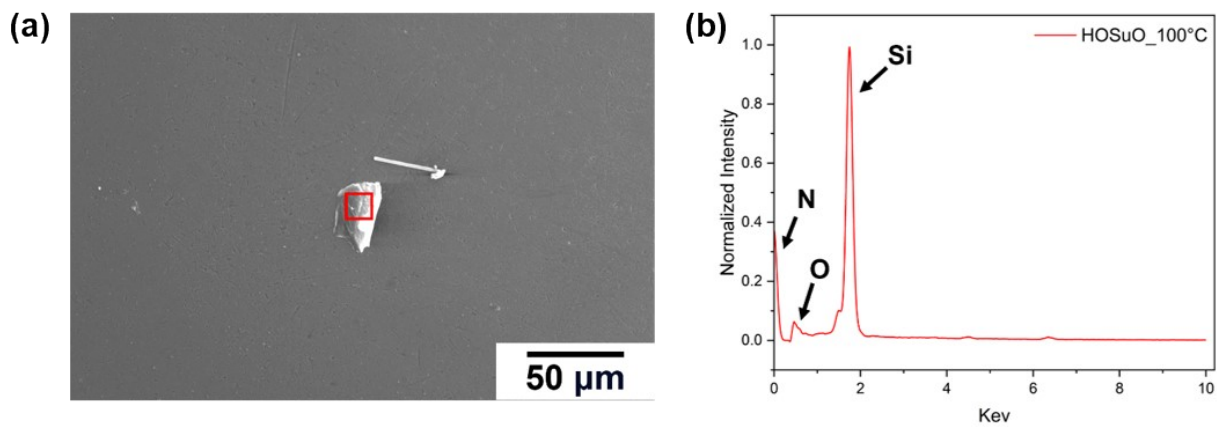

Figure S2. (a) SEM image (b) EDS analysis of HOSuo ball sample
